# Supplementary material
Source: PubMed Central journal article supplement (PMC3464414)

### Remote

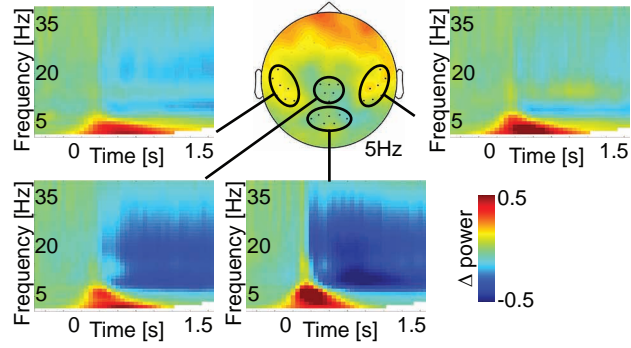

### Recent

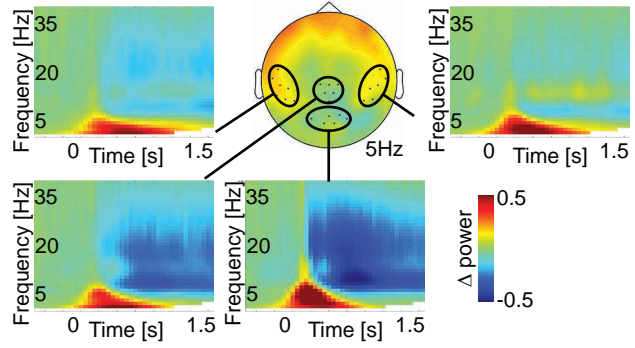

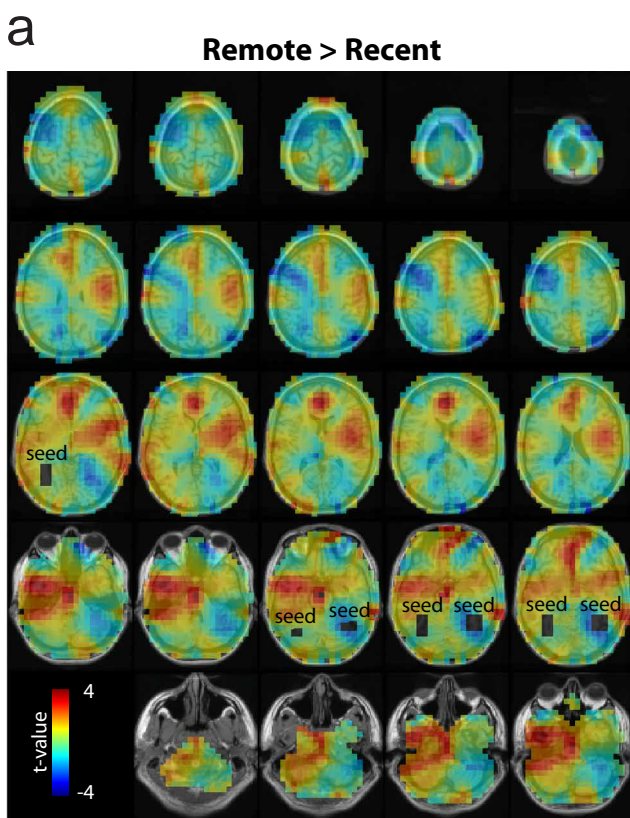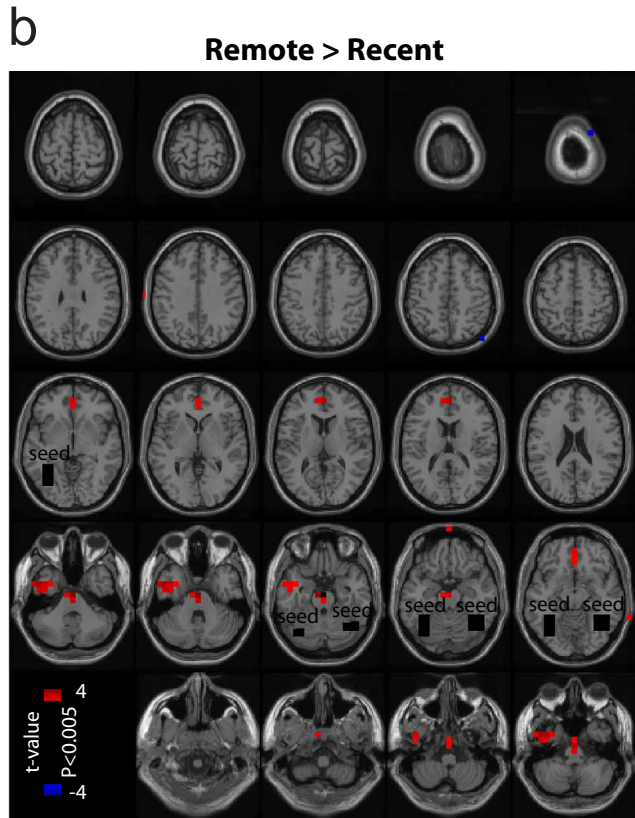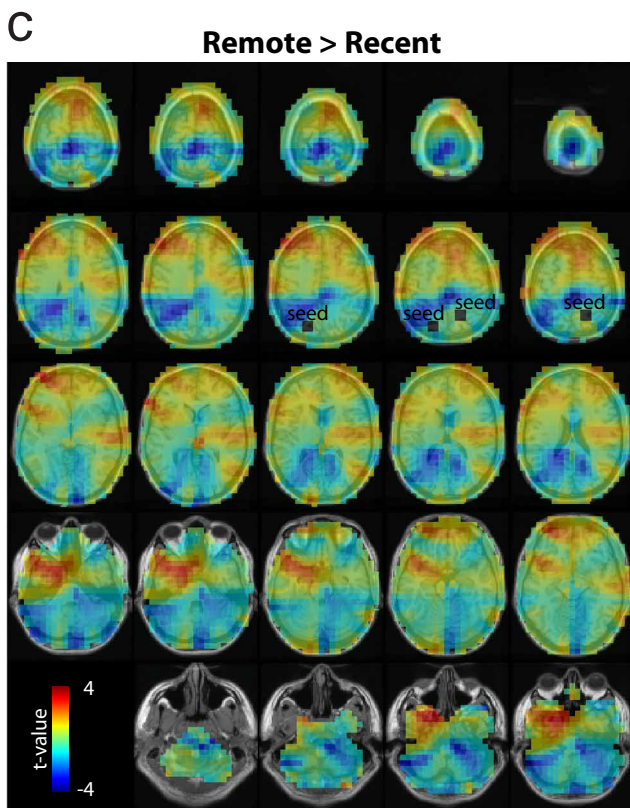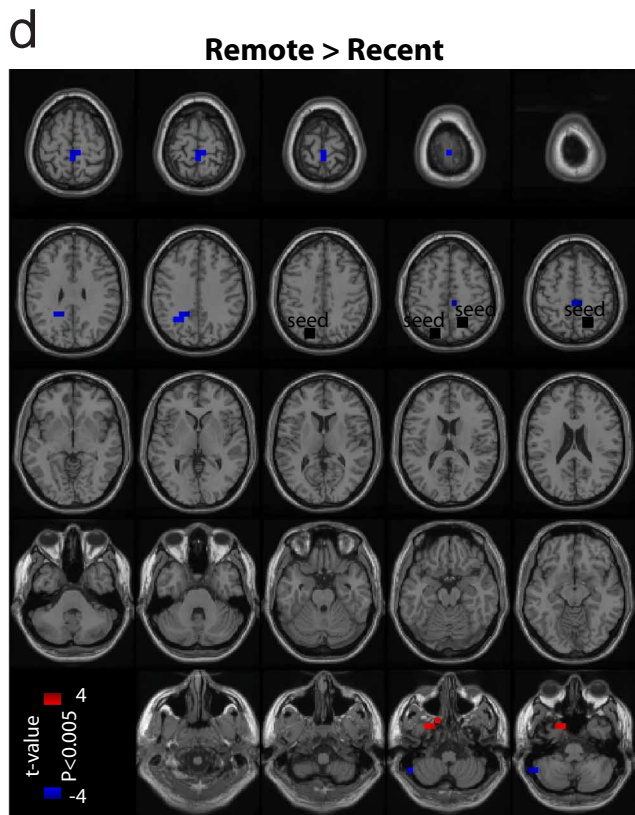

**a****Remote > Recent**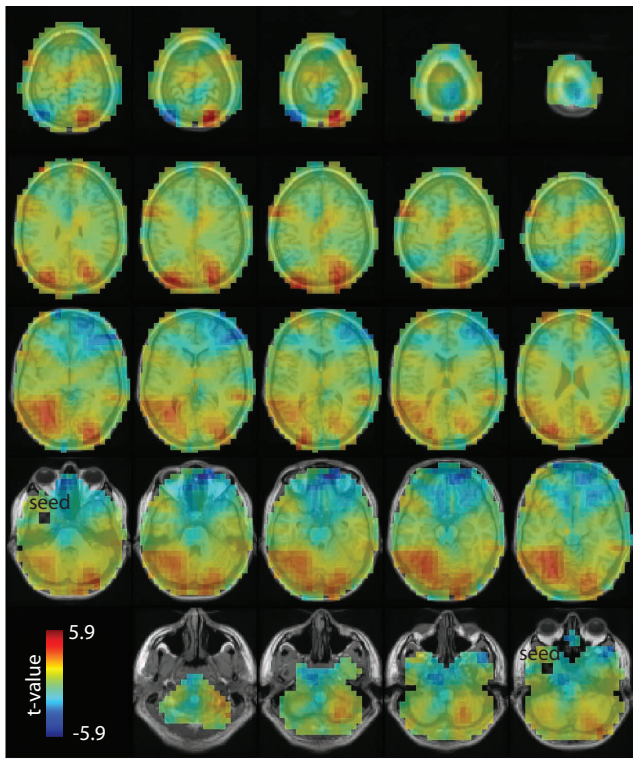**b****Remote > Recent**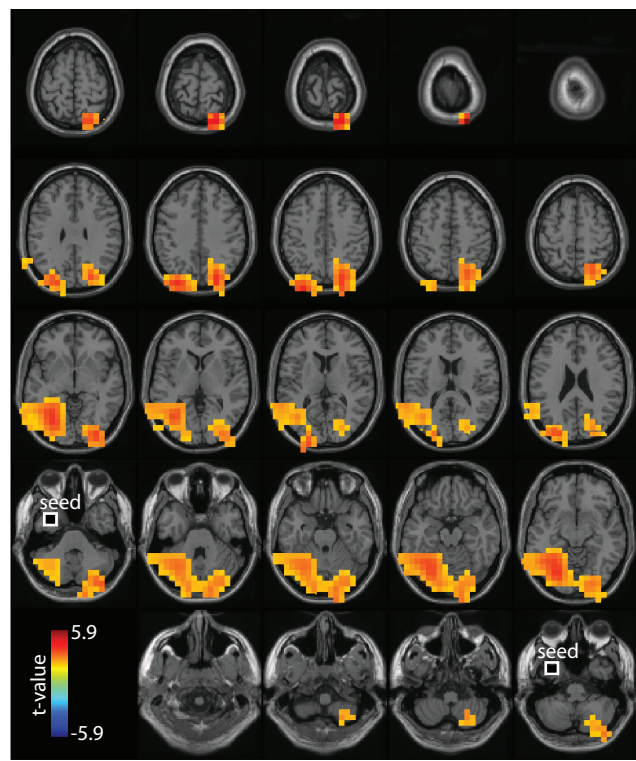

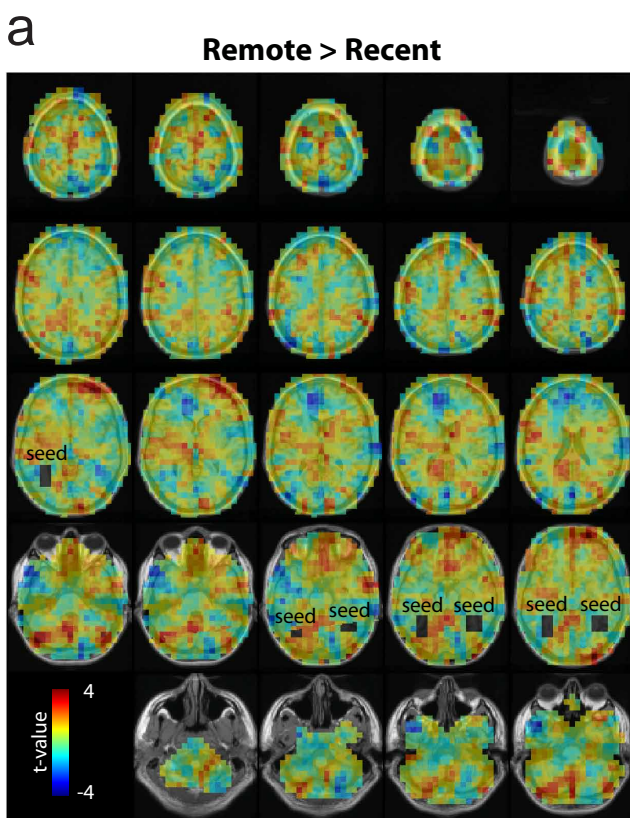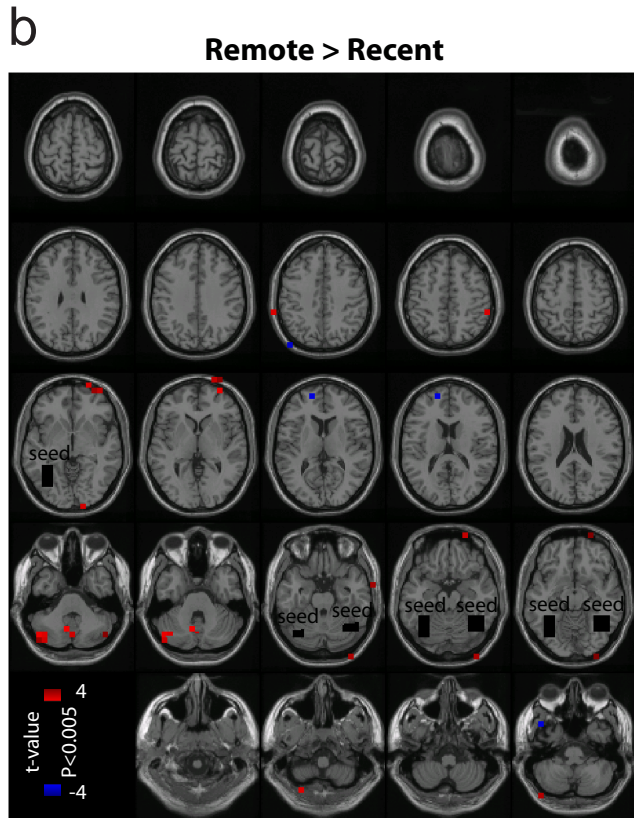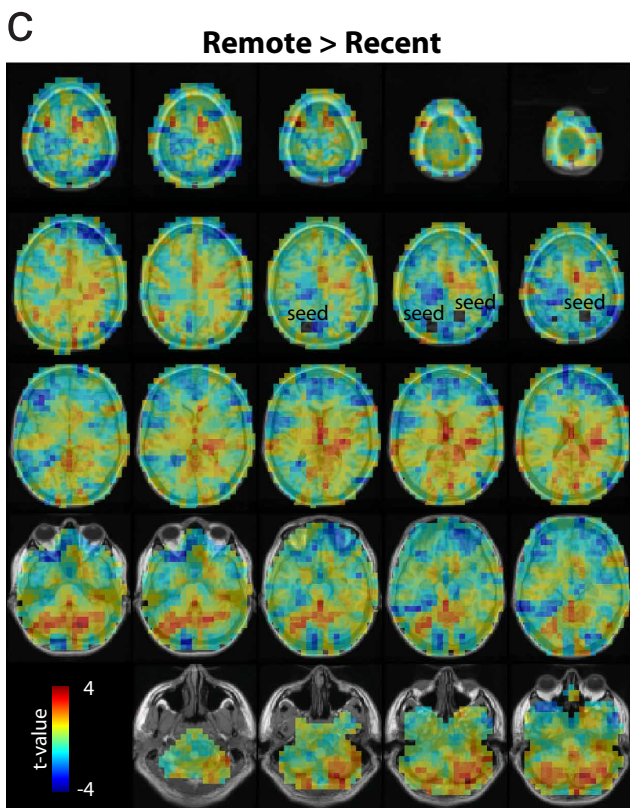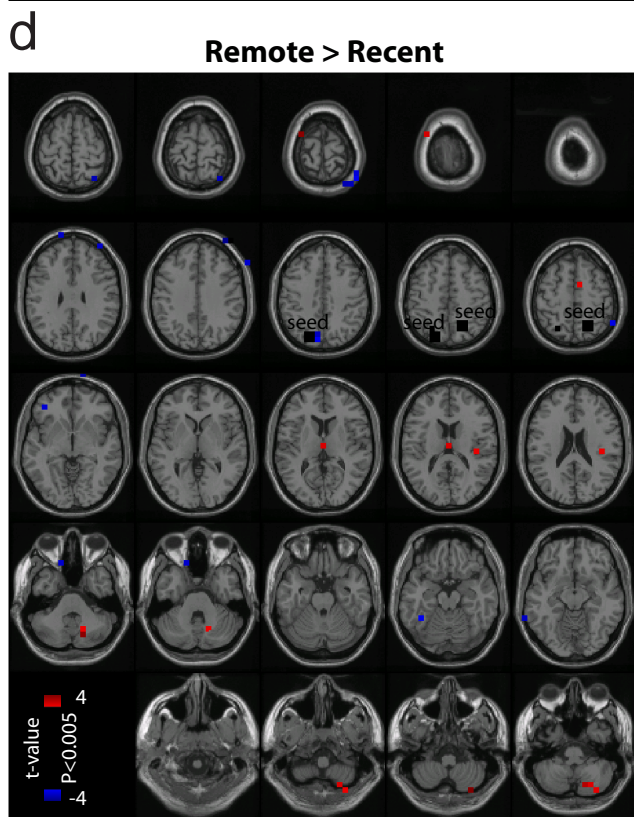

e

Remote > Recent

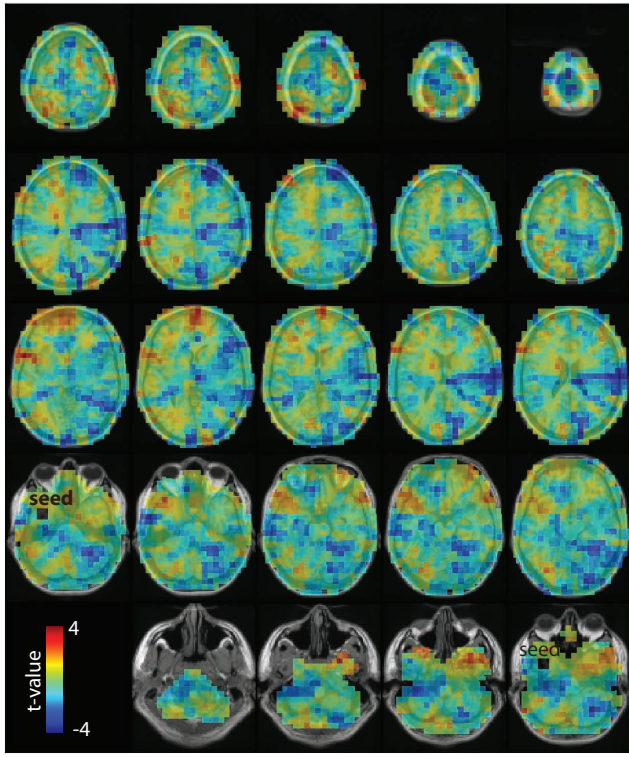

f

Remote > Recent

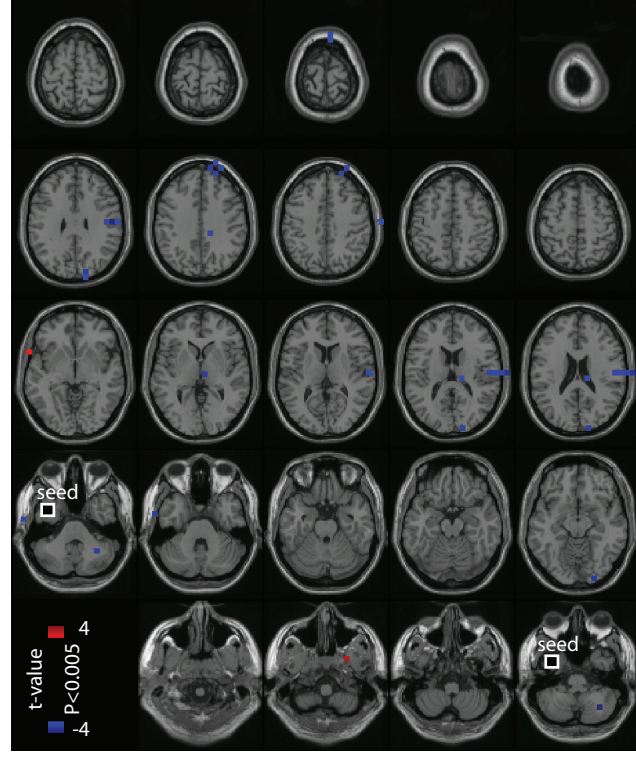

Supplement: supp_bhr338_supplementary_Figures.pdf [file supp_bhr338_supplementary_Figures.pdf]
